# Supplementary material
Source: PubMed Central journal article supplement (PMC6120748)
Supplement: jp8b05572_si_001.pdf [file jp8b05572_si_001.pdf]

# Oriented Attachment and Nanorod Formation in Atomic Layer Deposition of TiO<sub>2</sub> on Graphene Nanoplatelets

Fabio Grillo,<sup>\*,†,‡</sup> Damiano La Zara,<sup>†,‡</sup> Paul Mulder,<sup>†</sup> Michiel T. Kreutzer,<sup>†</sup> and J.  
Ruud van Ommen<sup>†</sup>

<sup>†</sup>*Department of Chemical Engineering, Delft University of Technology, 2629 HZ Delft, The  
Netherlands*

<sup>‡</sup>*These authors contributed equally to this work*

E-mail: f.grillo@tudelft.nl

## Supporting Information

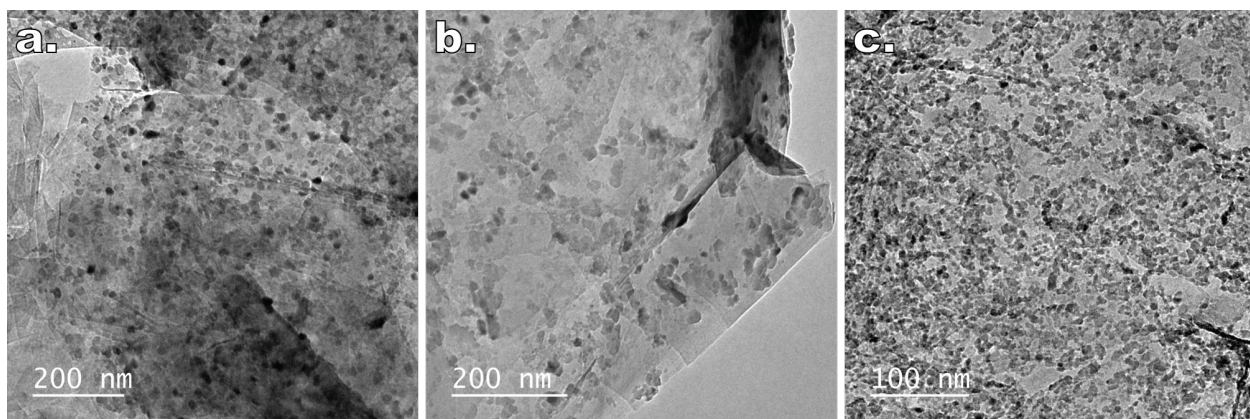

Figure S1: Effect of 2 hours of annealing at 300 °C in  $N_2 + H_2O$  (a and b) and synthetic air (c) on the morphology of the  $TiO_2$ /graphene composites obtained after 10 ALD cycles carried out at 200 °C (a and b) and 100 °C (c). The ALD cycles were carried out by following the pulsing sequence: 30 s  $TiCl_4$  - 5 min  $N_2$  purge - 30 s  $H_2O$  - 5 min  $N_2$  purge.

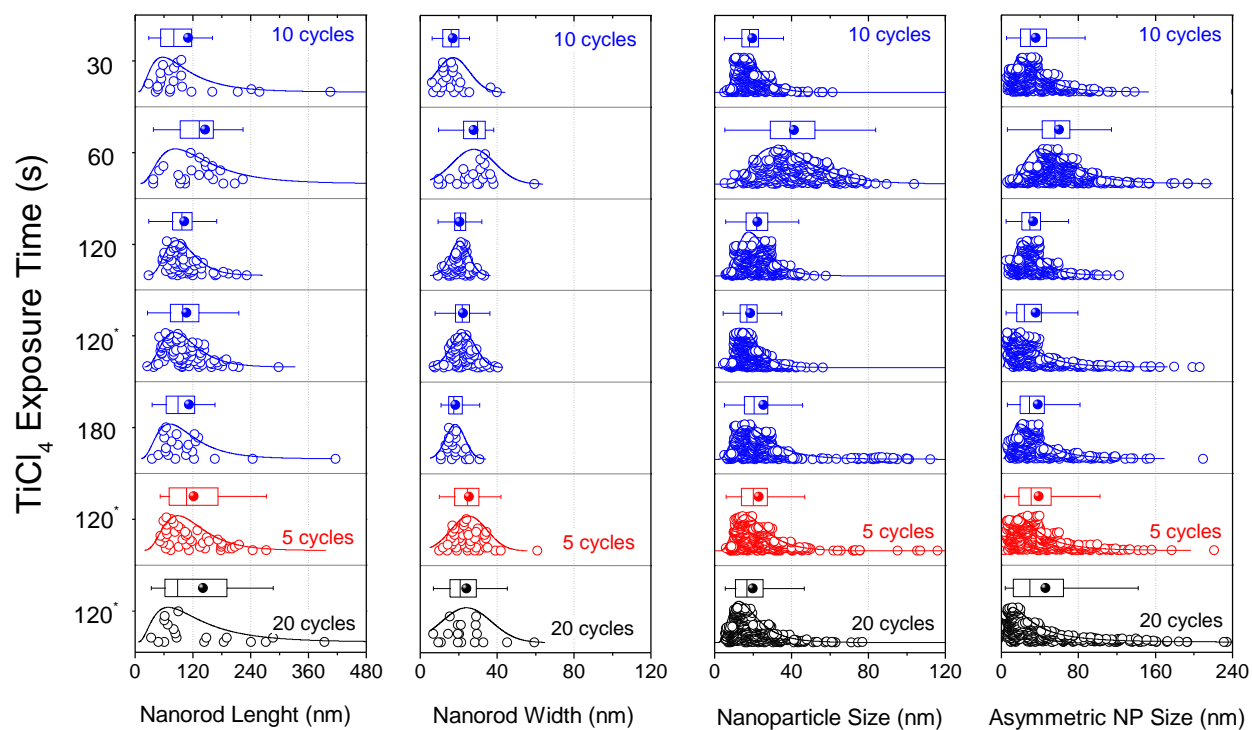

Figure S2: From left to right: distributions of the nanorod length, nanorod width, nanoparticle size, and size of the asymmetric nanoparticles. The experiments were carried out at 300°C (c). Unless otherwise specified the pulsing sequence was: 30 s TiCl<sub>4</sub> - 5 min N<sub>2</sub> purge - 30 s H<sub>2</sub>O - 5 min N<sub>2</sub> purge.

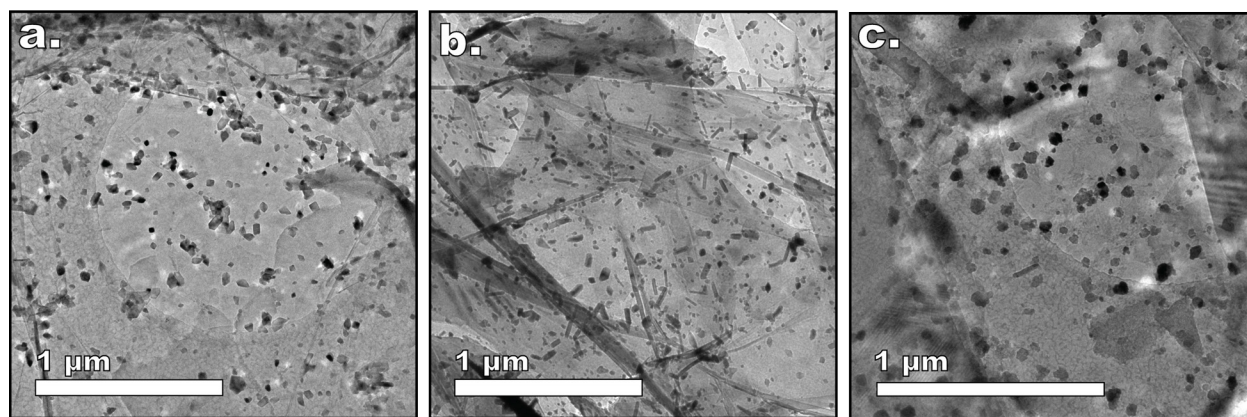

Figure S3: Effect of the water exposure on the morphology of the ALD-grown TiO<sub>2</sub> at 300 °C. Representative TEM images of the TiO<sub>2</sub>/Graphene composites obtained after 10 cycles using a water exposure time of 15 s (a), 30 s (b), and 2 min (c).

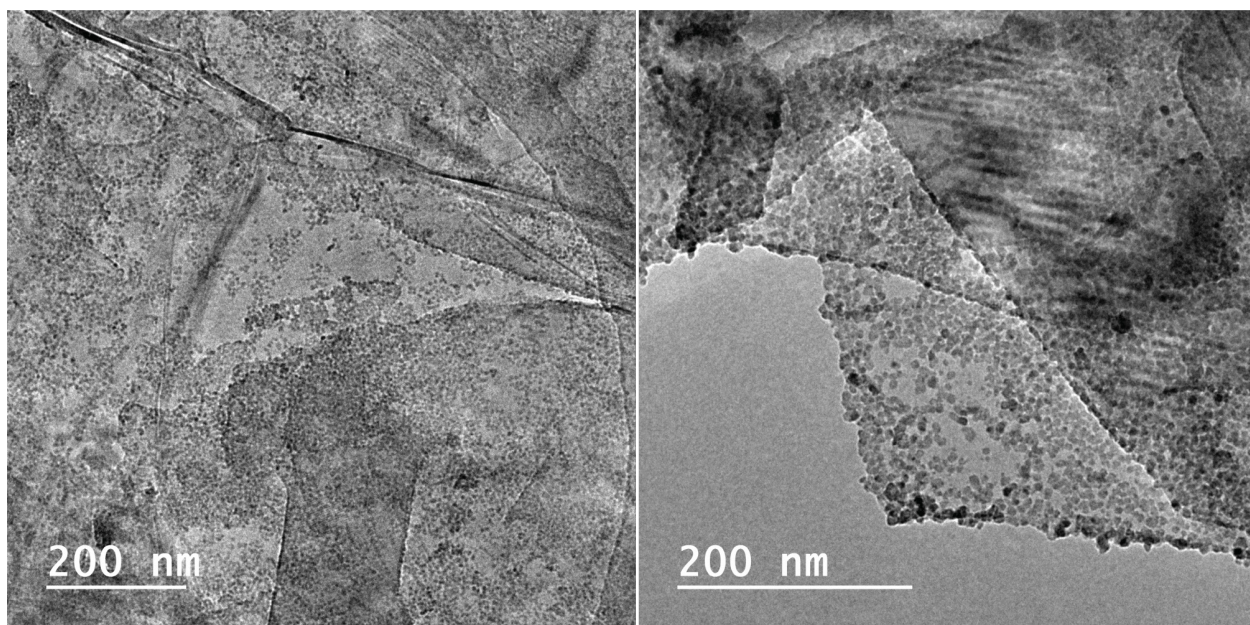

Figure S4: Representative TEM images of the TiO<sub>2</sub>/Graphene composite obtained after 10 ALD cycles carried out at 300 °C using titanium tetraisopropoxide (TTIP) instead of TiCl<sub>4</sub> as the titanium precursor. The ALD experiment was carried out by following the pulsing sequence: 2 min TTIP / 5 min N<sub>2</sub> purge / 30 s H<sub>2</sub>O / 5 min N<sub>2</sub> purge.

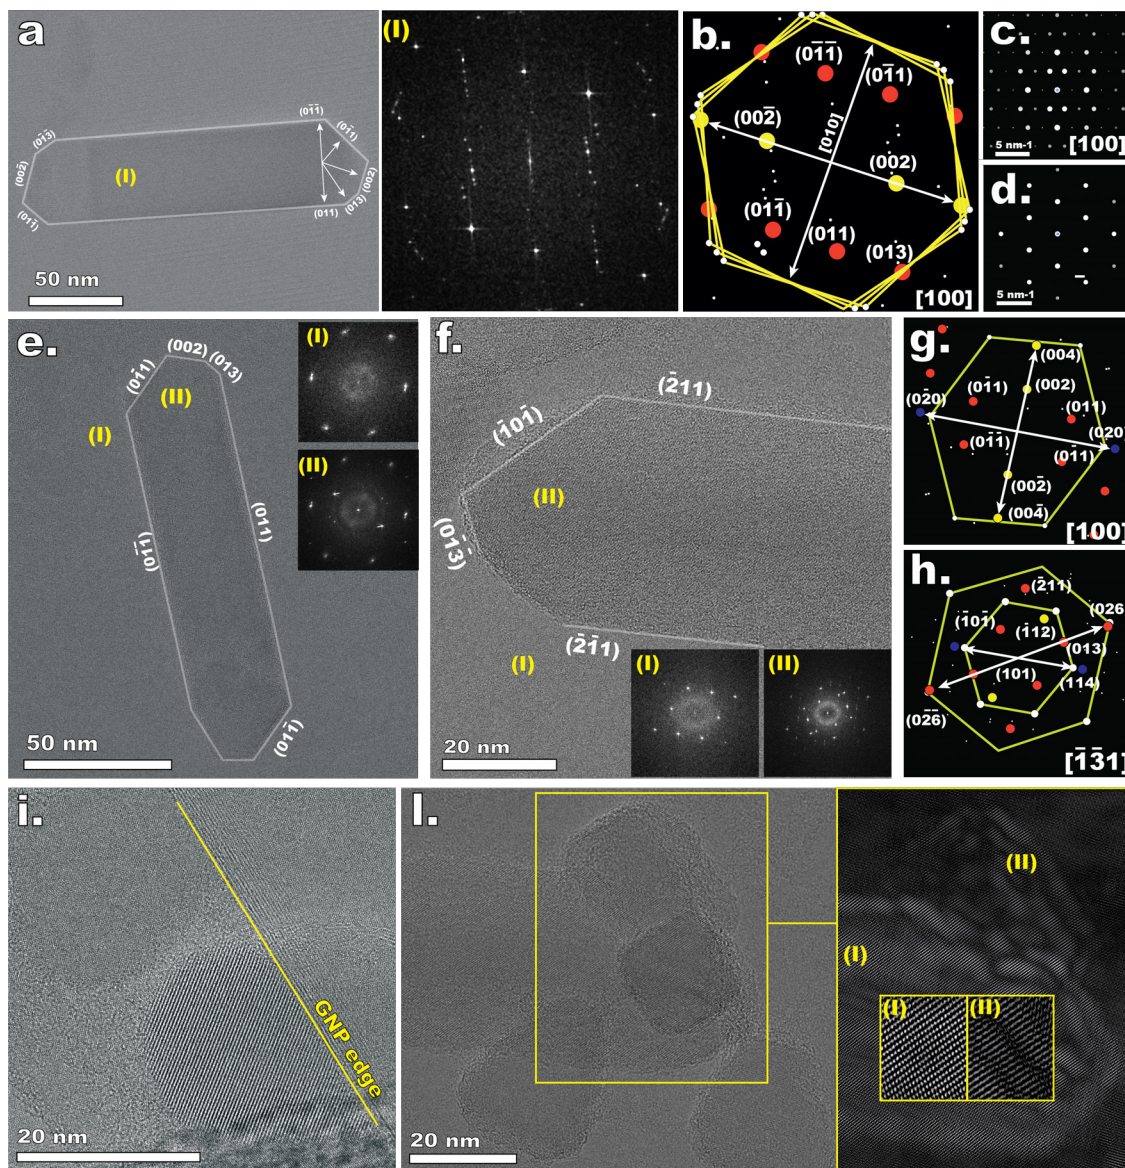

Figure S5: High resolution transmission electron microscopy (HRTEM) analysis of  $\text{TiO}_2$  nanostructures deposited after 10 cycles at  $300^\circ\text{C}$ . HRTEM image of a nanorod and its Fast-Fourier-Transform (a). Analysis of the FFT of the HRTEM image shown in (a), highlighting the alignment between the  $\text{TiO}_2$  lattice and the one of the underlying graphene nanoplatforms (b). Simulated electron diffraction patterns of anatase  $\text{TiO}_2$  (c) and graphene (d). HRTEM images of nanorods (e and f) and FFT images of selected areas of the graphene surface (I) and of the (II) nanorods. (g) and (h) show the analysis of the FFT spectra of images (e) and (f), respectively. HRTEM image of a  $\text{TiO}_2$  crystal pinned on the edge of a graphene nanoplatform (i). HRTEM image of the back of a nanorod and few  $\text{TiO}_2$  nanoparticles (l). The insert highlights the oriented attachment of one nanoparticle to the nanorod. The insert was obtained by inverting the FFT of image (l) after singling out the pattern associated with the  $\text{TiO}_2$  lattice. All the experiments were carried out by following the pulsing sequence: 2 min  $\text{TiCl}_4$  / 5 min  $\text{N}_2$  purge / 30 s  $\text{H}_2\text{O}$  / 5 min  $\text{N}_2$  purge.

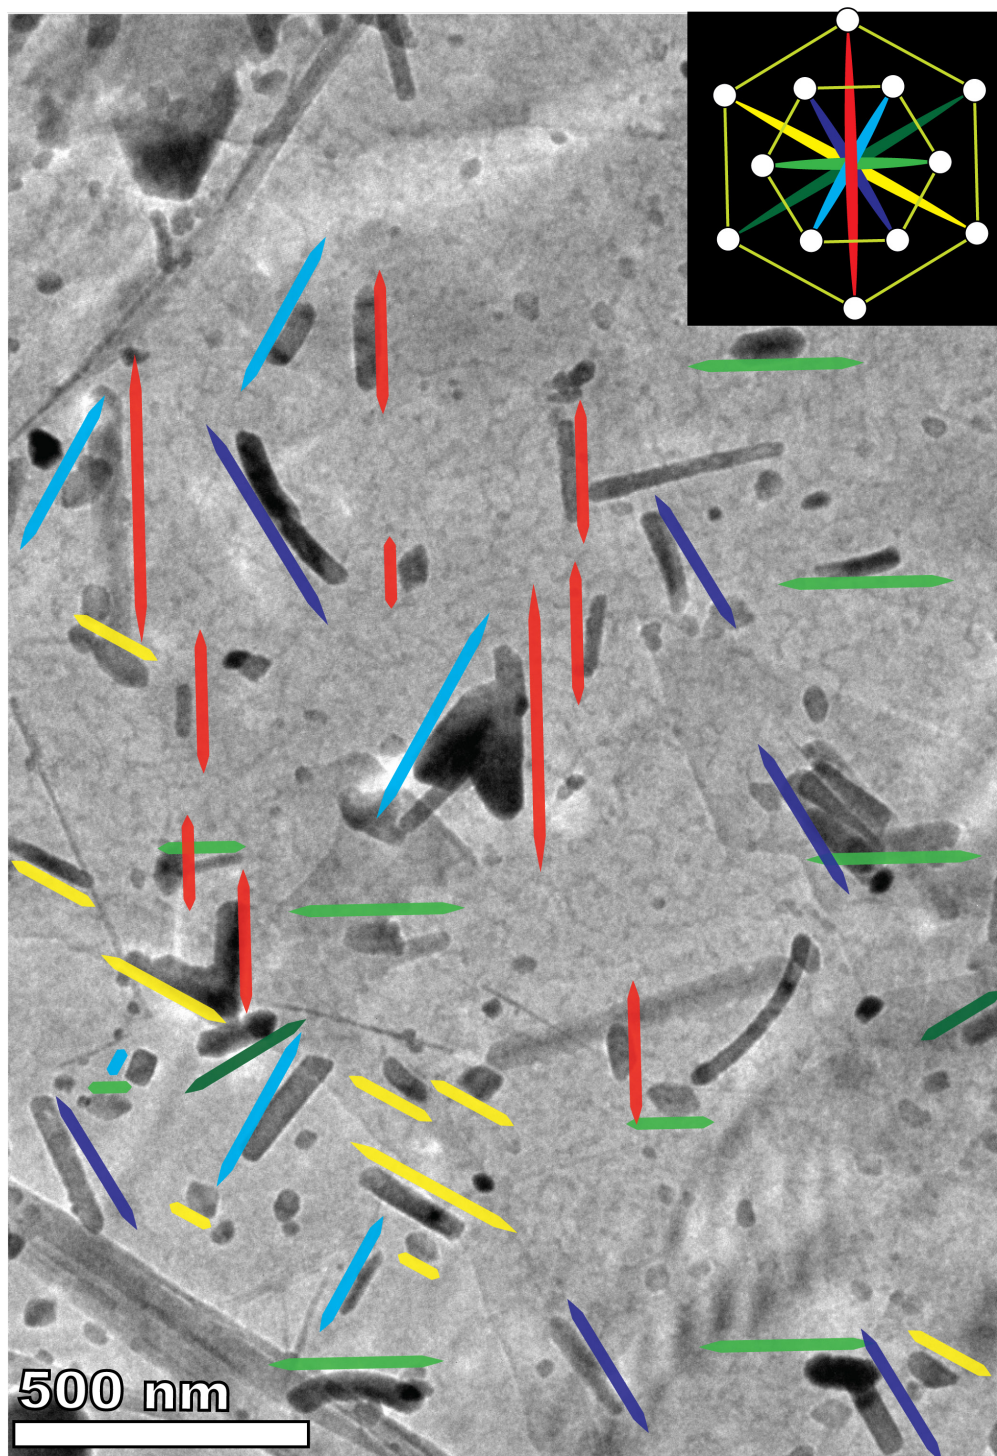

Figure S6: TEM image highlighting the preferential orientation of the nanorods according to a 12-fold symmetry.

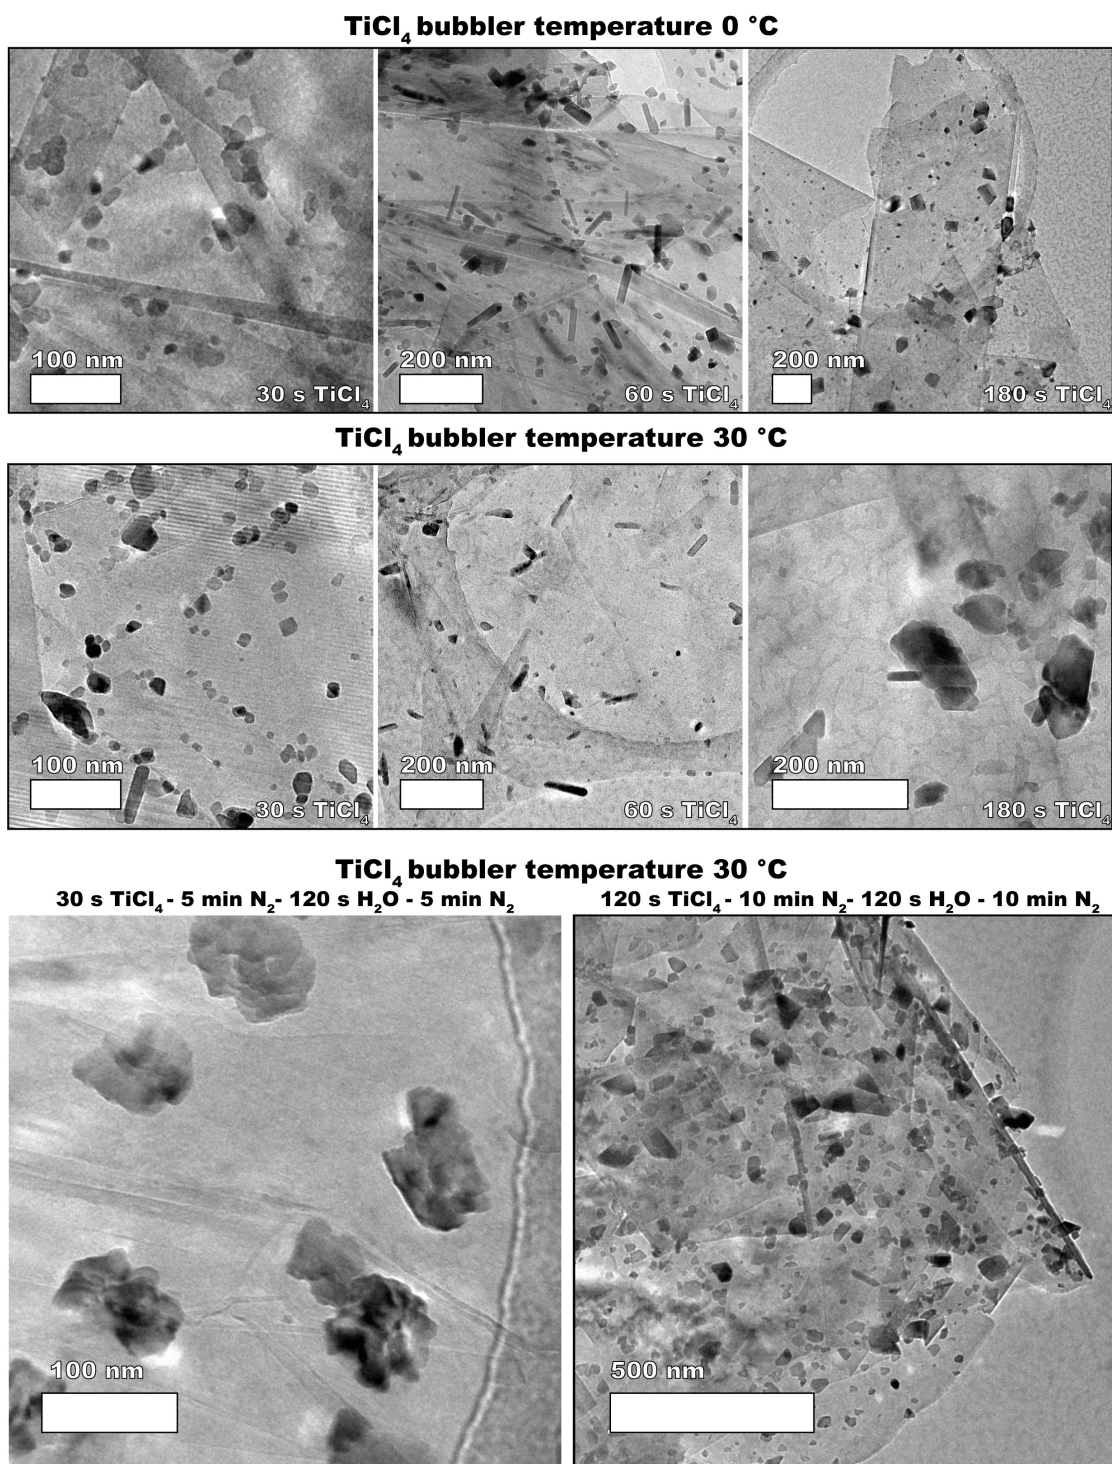

Figure S7: Supplementary TEM micrographs of TiO<sub>2</sub>/graphene composites obtained after 10 cycles using different pulsing sequences. Unless otherwise specified the reference pulsing sequence was 30 s TiCl<sub>4</sub> - 5 min N<sub>2</sub> purge - 30 s H<sub>2</sub>O - 5 min N<sub>2</sub> purge.
